# Supplementary material for: Controlled multimodal hierarchically porous electrode self-assembly of electrochemically exfoliated graphene for fully solid-state flexible supercapacitor
Source: Royal Society of Chemistry journal article supplement (doi:10.1039/c7cp05799g), 2017-01-01
Supplement: c7cp05799g1.pdf [file c7cp05799g1.pdf]

***Supporting Information***

**Controlled Multimodal Hierarchically Porous  
Electrode Self-assembly of Electrochemically  
Exfoliated Graphene for Fully Solid-State  
Flexible Supercapacitor**

Nurlia P. Sari<sup>†#§</sup>, Dipak Dutta<sup>^§</sup>, Anif Jamaluddin<sup>^±</sup>, Jeng-Kuei Chang<sup>%</sup> and Ching-Yuan Su<sup>†^\*</sup>

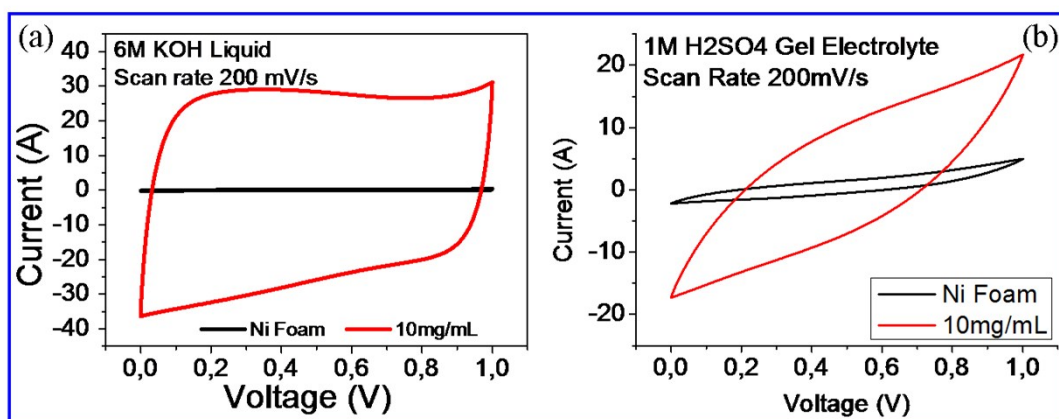

**Figure S1.** CV curves showing negligible contributions from the pristine Ni foam (black) as compared to EA10 (red) in (a) 6M aqueous KOH electrolyte and (b) 1M H<sub>2</sub>SO<sub>4</sub> gel electrolyte.

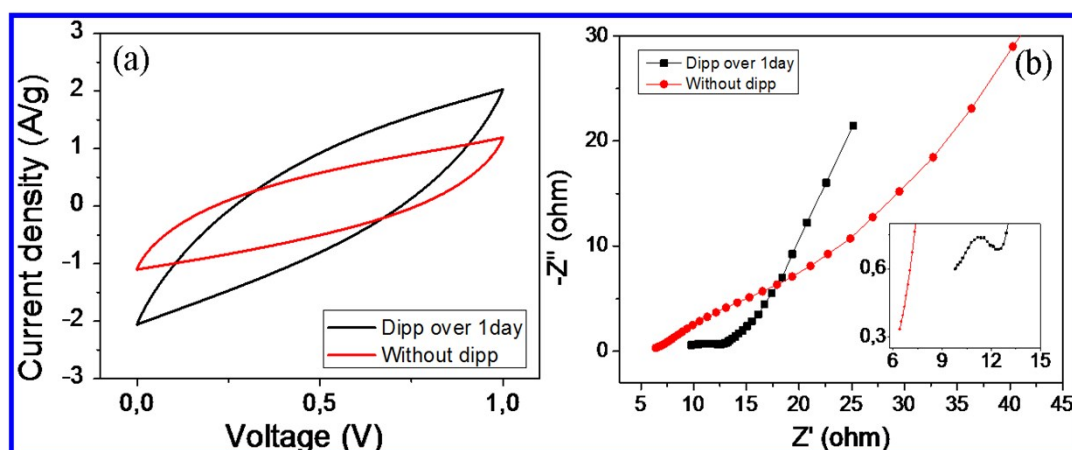

**Figure S2.**(a) CV curves and (b) Nyquist plots (inset: magnified view of high frequency region) of EA10 electrode pre-treated by dipping into dilute PVA-H<sub>2</sub>SO<sub>4</sub> gel electrolyte over one day (black) and the un-treated electrode (red).
